# Supplementary material
Source: publisher figshare collection journal article supplement (https://osapublishing.figshare.com/ndownloader/files/13491461)
Supplement: Supplementary file 1 [file 13491461]

# Data File 2 (Underlying data for Figure 5)
# Transmission spectra for FBGs
# Key: AC=Aberration Corrected; BS=Beamshaping; Pol1=Polarization 1; Pol2=Polarization 2
Wavelength (nm),AC Pol1 (dB),AC Pol2 (dB),BS Pol1 (dB),BS Pol2 (dB)
1527.0000000000,-0.6584850563,0.6261628376,0.5085841723,0.4628194874
1527.0050000000,-0.7319636909,-0.8043074074,-0.6899287149,-0.7127384001
1527.0100000000,-0.7359509318,-0.8043074074,-0.6925170415,-0.7127384001
1527.0150000000,-0.7379451486,-0.8164237255,-0.6899287149,-0.7076272321
1527.0200000000,-0.7399397631,-0.8043074074,-0.6847540705,-0.7076272321
1527.0250000000,-0.7399397631,-0.8083445491,-0.6873410580,-0.7050726274
1527.0300000000,-0.7459259950,-0.8144033194,-0.6873410580,-0.7076272321
1527.0350000000,-0.7399397631,-0.8164237255,-0.6795821025,-0.6974127266
1527.0400000000,-0.7359509318,-0.8164237255,-0.6718291624,-0.6974127266
1527.0450000000,-0.7399397631,-0.8184445399,-0.6795821025,-0.6974127266
1527.0500000000,-0.7439301862,-0.8224873942,-0.6899287149,-0.6974127266
1527.0550000000,-0.7379451486,-0.8144033194,-0.6795821025,-0.6974127266
1527.0600000000,-0.7359509318,-0.8123833214,-0.6847540705,-0.6923093838
1527.0650000000,-0.7339571127,-0.8123833214,-0.6692461842,-0.6948607297
1527.0700000000,-0.7359509318,-0.8043074074,-0.6821677521,-0.6923093838
1527.0750000000,-0.7399397631,-0.8164237255,-0.6744128080,-0.6948607297
1527.0800000000,-0.7299706665,-0.8063257745,-0.6640822285,-0.6846592496
1527.0850000000,-0.7319636909,-0.8002718948,-0.6666638730,-0.6795624095
1527.0900000000,-0.7259858089,-0.7922057520,-0.6692461842,-0.6795624095
1527.0950000000,-0.7239939754,-0.7881751192,-0.6666638730,-0.6744681659
1527.1000000000,-0.7100622387,-0.7841461102,-0.6666638730,-0.6719220170
1527.1050000000,-0.7060853048,-0.7841461102,-0.6640822285,-0.6668316631
1527.1100000000,-0.7120512989,-0.7760929590,-0.6589209381,-0.6642874575
1527.1150000000,-0.7080735741,-0.7740806841,-0.6408773709,-0.6642874575
1527.1200000000,-0.6981361788,-0.7680462879,-0.6383023741,-0.6566587222
1527.1250000000,-0.6961498843,-0.7700573487,-0.6357280402,-0.6566587222
1527.1300000000,-0.6961498843,-0.7740806841,-0.6434530309,-0.6566587222
1527.1350000000,-0.6981361788,-0.7660356314,-0.6434530309,-0.6515761300
1527.1400000000,-0.6782909649,-0.7720688141,-0.6331543688,-0.6490358023
1527.1450000000,-0.6862243251,-0.7720688141,-0.6383023741,-0.6490358023
1527.1500000000,-0.6862243251,-0.7740806841,-0.6254373266,-0.6490358023
1527.1550000000,-0.6802737150,-0.7640253791,-0.6305813597,-0.6464961197
1527.1600000000,-0.6822568583,-0.7559884086,-0.6202959383,-0.6388809397
1527.1650000000,-0.6763086079,-0.7559884086,-0.6254373266,-0.6388809397
1527.1700000000,-0.6763086079,-0.7640253791,-0.6177262351,-0.6338073729
1527.1750000000,-0.6782909649,-0.7539801748,-0.6125888089,-0.6338073729
1527.1800000000,-0.6743266438,-0.7620155308,-0.6151571921,-0.6236679551
1527.1850000000,-0.6723450724,-0.7519723443,-0.6100210851,-0.6211347062
1527.1900000000,-0.6683831072,-0.7640253791,-0.6125888089,-0.6211347062
1527.1950000000,-0.6743266438,-0.7660356314,-0.6125888089,-0.6160701327
1527.2000000000,-0.6683831072,-0.7700573487,-0.6074540206,-0.6135388076
1527.2050000000,-0.6763086079,-0.7781056389,-0.5997567784,-0.6135388076
1527.2100000000,-0.6802737150,-0.7760929590,-0.6023218675,-0.6135388076
1527.2150000000,-0.6882086490,-0.7861604118,-0.6100210851,-0.6160701327
1527.2200000000,-0.6802737150,-0.7760929590,-0.6048876148,-0.6135388076
1527.2250000000,-0.6882086490,-0.7821322143,-0.6125888089,-0.6135388076
1527.2300000000,-0.7001228680,-0.7982547491,-0.6202959383,-0.6160701327
1527.2350000000,-0.7060853048,-0.8022894475,-0.6151571921,-0.6186020988
1527.2400000000,-0.7001228680,-0.8002718948,-0.6202959383,-0.6135388076
1527.2450000000,-0.7001228680,-0.8103637314,-0.6280090124,-0.6211347062
1527.2500000000,-0.7180208543,-0.8245094345,-0.6280090124,-0.6236679551
1527.2550000000,-0.7279780392,-0.8366502696,-0.6228663021,-0.6287363789
1527.2600000000,-0.7259858089,-0.8366502696,-0.6228663021,-0.6262018459
1527.2650000000,-0.7319636909,-0.8447523564,-0.6254373266,-0.6287363789
1527.2700000000,-0.7479222022,-0.8609762496,-0.6408773709,-0.6338073729
1527.2750000000,-0.7559110183,-0.8731614664,-0.6357280402,-0.6388809397
1527.2800000000,-0.7579092199,-0.8711295655,-0.6357280402,-0.6388809397
1527.2850000000,-0.7699068218,-0.8812932009,-0.6280090124,-0.6439570820
1527.2900000000,-0.7679062216,-0.8935032146,-0.6434530309,-0.6515761300
1527.2950000000,-0.7759110250,-0.9098064585,-0.6486063420,-0.6566587222
1527.3000000000,-0.7939452949,-0.9057281550,-0.6537623102,-0.6592009874
1527.3050000000,-0.8039784050,-0.9220513580,-0.6537623102,-0.6642874575
1527.3100000000,-0.8079944694,-0.9384012492,-0.6718291624,-0.6719220170
1527.3150000000,-0.8240748748,-0.9506812344,-0.6718291624,-0.6821105048
1527.3200000000,-0.8160314399,-0.9547779162,-0.6718291624,-0.6821105048
1527.3250000000,-0.8381664725,-0.9568268866,-0.6769971212,-0.6923093838
1527.3300000000,-0.8401811799,-0.9752865370,-0.6873410580,-0.6999653750
1527.3350000000,-0.8482440709,-0.9835017767,-0.6976957056,-0.7025186752
1527.3400000000,-0.8623697921,-0.9958373046,-0.6951060383,-0.7127384001
1527.3450000000,-0.8522779556,-0.9917237710,-0.6899287149,-0.7127384001
1527.3500000000,-0.8623697921,-1.0040694516,-0.6976957056,-0.7152949641
1527.3550000000,-0.8724718235,-1.0061285476,-0.6976957056,-0.7229685801
1527.3600000000,-0.8724718235,-1.0164303926,-0.7002860436,-0.7280875973
1527.3650000000,-0.8724718235,-1.0123083810,-0.7080610861,-0.7280875973
1527.3700000000,-0.8765154952,-1.0061285476,-0.7080610861,-0.7306480890
1527.3750000000,-0.8744934550,-1.0226165975,-0.7132478082,-0.7408966166
1527.3800000000,-0.8846077473,-1.0308708283,-0.7236293300,-0.7434603905
1527.3850000000,-0.8866318340,-1.0267428613,-0.7054687335,-0.7408966166
1527.3900000000,-0.8927065532,-1.0184920357,-0.7028770528,-0.7460248219
1527.3950000000,-0.8846077473,-1.0308708283,-0.7132478082,-0.7537220641
1527.4000000000,-0.8927065532,-1.0267428613,-0.7236293300,-0.7537220641
1527.4050000000,-0.8866318340,-1.0143691744,-0.7054687335,-0.7434603905
1527.4100000000,-0.8805608027,-1.0184920357,-0.7132478082,-0.7434603905
1527.4150000000,-0.8846077473,-1.0164303926,-0.7132478082,-0.7383334999
1527.4200000000,-0.8765154952,-1.0123083810,-0.7054687335,-0.7383334999
1527.4250000000,-0.8664093802,-1.0081880678,-0.6847540705,-0.7255277611
1527.4300000000,-0.8623697921,-0.9978947061,-0.6951060383,-0.7229685801
1527.4350000000,-0.8664093802,-0.9814473340,-0.6795821025,-0.7204100538
1527.4400000000,-0.8502608098,-0.9793933132,-0.6718291624,-0.7178521819
1527.4450000000,-0.8381664725,-0.9588762769,-0.6666638730,-0.7076272321
1527.4500000000,-0.8341382751,-0.9588762769,-0.6589209381,-0.6999653750
1527.4550000000,-0.8240748748,-0.9486335227,-0.6511839938,-0.6974127266
1527.4600000000,-0.8220634095,-0.9363560503,-0.6460293545,-0.6923093838
1527.4650000000,-0.7999639530,-0.9261363254,-0.6408773709,-0.6770149633
1527.4700000000,-0.7939452949,-0.8996138167,-0.6228663021,-0.6668316631
1527.4750000000,-0.7819188353,-0.8833271682,-0.6202959383,-0.6592009874
1527.4800000000,-0.7759110250,-0.8853615492,-0.6048876148,-0.6541171032
1527.4850000000,-0.7619068214,-0.8650363390,-0.6048876148,-0.6363438346
1527.4900000000,-0.7539132159,-0.8386751760,-0.5818195538,-0.6262018459
1527.4950000000,-0.7319636909,-0.8305780095,-0.5818195538,-0.6160701327
1527.5000000000,-0.7299706665,-0.8164237255,-0.5741420103,-0.6084780787
1527.5050000000,-0.7060853048,-0.8043074074,-0.5460413403,-0.5907856692
1527.5100000000,-0.7060853048,-0.7861604118,-0.5332943660,-0.5756456209
1527.5150000000,-0.6782909649,-0.7640253791,-0.5282001224,-0.5706040276
1527.5200000000,-0.6664027131,-0.7519723443,-0.5154758555,-0.5554944806
1527.5250000000,-0.6446442236,-0.7138999609,-0.4900757911,-0.5353838655
1527.5300000000,-0.6327958810,-0.7059031592,-0.4723340553,-0.5178201926
1527.5350000000,-0.6229329746,-0.6879337024,-0.4596806309,-0.5052935719
1527.5400000000,-0.6032362970,-0.6719879147,-0.4622100352,-0.4902823107
1527.5450000000,-0.5855423968,-0.6461301181,-0.4344217137,-0.4703022840
1527.5500000000,-0.5698407252,-0.6342182644,-0.4218161404,-0.4578350090
1527.5550000000,-0.5639589488,-0.6104370403,-0.4117431100,-0.4478723681
1527.5600000000,-0.5404663773,-0.5965907321,-0.3966525639,-0.4354330084
1527.5650000000,-0.5287407554,-0.5728987171,-0.3866048364,-0.4130810805
1527.5700000000,-0.5053306784,-0.5591042524,-0.3790756605,-0.4056415266
1527.5750000000,-0.4975394821,-0.5512302362,-0.3615295976,-0.3932545561
1527.5800000000,-0.4897543513,-0.5335363360,-0.3515170811,-0.3808829103
1527.5850000000,-0.4683764401,-0.5119528880,-0.3365170783,-0.3635882797
1527.5900000000,-0.4586742952,-0.4962850431,-0.3240342405,-0.3512532590
1527.5950000000,-0.4412341202,-0.4884603165,-0.3190454652,-0.3340097518
1527.6000000000,-0.4354274812,-0.4708770356,-0.3165520105,-0.3241696526
1527.6050000000,-0.4141652715,-0.4572224934,-0.2991152144,-0.3118831294
1527.6100000000,-0.3987301923,-0.4396940051,-0.2817087697,-0.3045184549
1527.6150000000,-0.3910215775,-0.4260819466,-0.2767410597,-0.2971592003
1527.6200000000,-0.3794697857,-0.4202538746,-0.2817087697,-0.2898053576
1527.6250000000,-0.3679313229,-0.3969754935,-0.2742581298,-0.2775609579
1527.6300000000,-0.3564061583,-0.3814866231,-0.2618527195,-0.2702215080
1527.6350000000,-0.3525673867,-0.3872921385,-0.2668130370,-0.2653315324
1527.6400000000,-0.3448942614,-0.3718182476,-0.2593734831,-0.2604439468
1527.6450000000,-0.3353111270,-0.3660217060,-0.2469865126,-0.2555587488
1527.6500000000,-0.3295656514,-0.3409421134,-0.2494626795,-0.2506759362
1527.6550000000,-0.3219101487,-0.3351634366,-0.2395616886,-0.2433561848
1527.6600000000,-0.3161723652,-0.3390155168,-0.2321423733,-0.2433561848
1527.6650000000,-0.3123490044,-0.3216928293,-0.2420360174,-0.2409174578
1527.6700000000,-0.2932540969,-0.3140034787,-0.2197890672,-0.2311684928
1527.6750000000,-0.2951619478,-0.3159252621,-0.2247285585,-0.2238630012
1527.6800000000,-0.2875327275,-0.3005613259,-0.2222585079,-0.2238630012
1527.6850000000,-0.2875327275,-0.3120820645,-0.2296704909,-0.2214290229
1527.6900000000,-0.2818146295,-0.2909708390,-0.2123844019,-0.2116990294
1527.6950000000,-0.2856263315,-0.2967240273,-0.2148520145,-0.2141306403
1527.7000000000,-0.2837202989,-0.2928882007,-0.2099173981,-0.2116990294
1527.7050000000,-0.2837202989,-0.2948059301,-0.2197890672,-0.2141306403
1527.7100000000,-0.2780043799,-0.2794743824,-0.2173202362,-0.2092680096
1527.7150000000,-0.2684851027,-0.2813895409,-0.2099173981,-0.2068375806
1527.7200000000,-0.2703882333,-0.2871372181,-0.2173202362,-0.2092680096
1527.7250000000,-0.2703882333,-0.2852209586,-0.2173202362,-0.2092680096
1527.7300000000,-0.2684851027,-0.2775595907,-0.2123844019,-0.2044077422
1527.7350000000,-0.2665823341,-0.2737311067,-0.1975914998,-0.2019784940
1527.7400000000,-0.2646799276,-0.2737311067,-0.2099173981,-0.2044077422
1527.7450000000,-0.2665823341,-0.2833050663,-0.2025200361,-0.2044077422
1527.7500000000,-0.2646799276,-0.2737311067,-0.1926653913,-0.1971217673
1527.7550000000,-0.2589748785,-0.2641663044,-0.2049852155,-0.1971217673
1527.7600000000,-0.2646799276,-0.2775595907,-0.2049852155,-0.1946942883
1527.7650000000,-0.2627778829,-0.2660785331,-0.2000554643,-0.1946942883
1527.7700000000,-0.2627778829,-0.2565210441,-0.1902032468,-0.1898410972
1527.7750000000,-0.2608761999,-0.2660785331,-0.1926653913,-0.1874153846
1527.7800000000,-0.2608761999,-0.2718174142,-0.2049852155,-0.1849902603
1527.7850000000,-0.2665823341,-0.2699040879,-0.1951281422,-0.1849902603
1527.7900000000,-0.2513732057,-0.2622544413,-0.1877417083,-0.1752956401
1527.7950000000,-0.2513732057,-0.2546106420,-0.1902032468,-0.1777184142
1527.8000000000,-0.2475745352,-0.2565210441,-0.1926653913,-0.1777184142
1527.8050000000,-0.2456757409,-0.2565210441,-0.1779016091,-0.1680308377
1527.8100000000,-0.2380841672,-0.2527006047,-0.1779016091,-0.1631905666
1527.8150000000,-0.2475745352,-0.2488816244,-0.1779016091,-0.1631905666
1527.8200000000,-0.2456757409,-0.2431558870,-0.1803607263,-0.1631905666
1527.8250000000,-0.2418792337,-0.2488816244,-0.1779016091,-0.1583526371
1527.8300000000,-0.2437773071,-0.2488816244,-0.1607047003,-0.1511001286
1527.8350000000,-0.2380841672,-0.2469726809,-0.1631595917,-0.1511001286
1527.8400000000,-0.2342905405,-0.2431558870,-0.1607047003,-0.1511001286
1527.8450000000,-0.2342905405,-0.2469726809,-0.1557967248,-0.1486837942
1527.8500000000,-0.2267076017,-0.2355266667,-0.1508911568,-0.1414382921
1527.8550000000,-0.2191304087,-0.2336202708,-0.1508911568,-0.1414382921
1527.8600000000,-0.2172370072,-0.2336202708,-0.1508911568,-0.1366108723
1527.8650000000,-0.2172370072,-0.2279032625,-0.1459879942,-0.1366108723
1527.8700000000,-0.2096669841,-0.2145762734,-0.1435373141,-0.1269630182
1527.8750000000,-0.2134512794,-0.2183821726,-0.1386377550,-0.1269630182
1527.8800000000,-0.2077753734,-0.2126738668,-0.1288458326,-0.1245525084
1527.8850000000,-0.2002125067,-0.2126738668,-0.1337405953,-0.1245525084
1527.8900000000,-0.2002125067,-0.1993671450,-0.1337405953,-0.1173244632
1527.8950000000,-0.1964332172,-0.2050678577,-0.1312929144,-0.1149162754
1527.9000000000,-0.1926553554,-0.1955684745,-0.1239534645,-0.1149162754
1527.9050000000,-0.1851039109,-0.2050678577,-0.1410872345,-0.1149162754
1527.9100000000,-0.1926553554,-0.1860781065,-0.1337405953,-0.1101016388
1527.9150000000,-0.1851039109,-0.1860781065,-0.1239534645,-0.1101016388
1527.9200000000,-0.1719025888,-0.1936696802,-0.1166193975,-0.1101016388
1527.9250000000,-0.1719025888,-0.1784922916,-0.1215081778,-0.1101016388
1527.9300000000,-0.1719025888,-0.1822844797,-0.1263993494,-0.1125086673
1527.9350000000,-0.1587186713,-0.1747015410,-0.1068490010,-0.1052893192
1527.9400000000,-0.1568366726,-0.1709122268,-0.1117330060,-0.1052893192
1527.9450000000,-0.1587186713,-0.1576609234,-0.1092907053,-0.1028840275
1527.9500000000,-0.1549550280,-0.1538780597,-0.0995274632,-0.1052893192
1527.9550000000,-0.1474319884,-0.1500966265,-0.1044078927,-0.0980751791
1527.9600000000,-0.1399146041,-0.1538780597,-0.0970881413,-0.0980751791
1527.9650000000,-0.1436725898,-0.1576609234,-0.0922112819,-0.0932686422
1527.9700000000,-0.1380361406,-0.1519871644,-0.0897737438,-0.0908662397
1527.9750000000,-0.1342802720,-0.1463166227,-0.0775949577,-0.0836624935
1527.9800000000,-0.1211458298,-0.1406492947,-0.0970881413,-0.0812623975
1527.9850000000,-0.1324028666,-0.1406492947,-0.0922112819,-0.0788628774
1527.9900000000,-0.1305258136,-0.1368728596,-0.0775949577,-0.0764639329
1527.9950000000,-0.1117746361,-0.1274380065,-0.0873367997,-0.0668739058
1528.0000000000,-0.1211458298,-0.1330978501,-0.0751609794,-0.0668739058
1528.0050000000,-0.1173962984,-0.1198965281,-0.0824646924,-0.0668739058
1528.0100000000,-0.1192708884,-0.1274380065,-0.0751609794,-0.0668739058
1528.0150000000,-0.1155220598,-0.1236665564,-0.0654309859,-0.0620823388
1528.0200000000,-0.1117746361,-0.1217813645,-0.0654309859,-0.0644778353
1528.0250000000,-0.1117746361,-0.1161279205,-0.0751609794,-0.0644778353
1528.0300000000,-0.1042839991,-0.1123607327,-0.0678625968,-0.0644778353
1528.0350000000,-0.1024122162,-0.1104776708,-0.0605695371,-0.0620823388
1528.0400000000,-0.1005407836,-0.1161279205,-0.0654309859,-0.0596874161
1528.0450000000,-0.1061561324,-0.1104776708,-0.0678625968,-0.0572930667
1528.0500000000,-0.1136481724,-0.1198965281,-0.0654309859,-0.0620823388
1528.0550000000,-0.0967989688,-0.1048306118,-0.0605695371,-0.0525060872
1528.0600000000,-0.0986697012,-0.1067126105,-0.0654309859,-0.0548992905
1528.0650000000,-0.1080286162,-0.1085949635,-0.0508537238,-0.0548992905
1528.0700000000,-0.1155220598,-0.1161279205,-0.0654309859,-0.0572930667
1528.0750000000,-0.1080286162,-0.1029489673,-0.0532817923,-0.0501134565
1528.0800000000,-0.1061561324,-0.1029489673,-0.0557104505,-0.0525060872
1528.0850000000,-0.1024122162,-0.1180120468,-0.0629999661,-0.0548992905
1528.0900000000,-0.1117746361,-0.1255521037,-0.0702947992,-0.0596874161
1528.0950000000,-0.1061561324,-0.1161279205,-0.0702947992,-0.0596874161
1528.1000000000,-0.1080286162,-0.1142441492,-0.0702947992,-0.0620823388
1528.1050000000,-0.1173962984,-0.1161279205,-0.0849004493,-0.0644778353
1528.1100000000,-0.1192708884,-0.1293242652,-0.0849004493,-0.0716677697
1528.1150000000,-0.1099014508,-0.1104776708,-0.0727275933,-0.0692705505
1528.1200000000,-0.1099014508,-0.1198965281,-0.0873367997,-0.0764639329
1528.1250000000,-0.1173962984,-0.1217813645,-0.0775949577,-0.0836624935
1528.1300000000,-0.1211458298,-0.1274380065,-0.0946494143,-0.0884644143
1528.1350000000,-0.1192708884,-0.1255521037,-0.0946494143,-0.0908662397
1528.1400000000,-0.1192708884,-0.1293242652,-0.0873367997,-0.1004793143
1528.1450000000,-0.1248967676,-0.1387608989,-0.0946494143,-0.1028840275
1528.1500000000,-0.1286491128,-0.1349851767,-0.1092907053,-0.1052893192
1528.1550000000,-0.1173962984,-0.1330978501,-0.1044078927,-0.1052893192
1528.1600000000,-0.1192708884,-0.1406492947,-0.1215081778,-0.1101016388
1528.1650000000,-0.1342802720,-0.1444271564,-0.1190634889,-0.1149162754
1528.1700000000,-0.1286491128,-0.1330978501,-0.1263993494,-0.1149162754
1528.1750000000,-0.1192708884,-0.1274380065,-0.1215081778,-0.1149162754
1528.1800000000,-0.1248967676,-0.1293242652,-0.1288458326,-0.1197332312
1528.1850000000,-0.1211458298,-0.1387608989,-0.1215081778,-0.1317857817
1528.1900000000,-0.1305258136,-0.1425380472,-0.1239534645,-0.1341980360
1528.1950000000,-0.1192708884,-0.1330978501,-0.1337405953,-0.1317857817
1528.2000000000,-0.1117746361,-0.1274380065,-0.1190634889,-0.1366108723
1528.2050000000,-0.1211458298,-0.1312108796,-0.1288458326,-0.1390242909
1528.2100000000,-0.1248967676,-0.1236665564,-0.1312929144,-0.1390242909
1528.2150000000,-0.1192708884,-0.1274380065,-0.1312929144,-0.1341980360
1528.2200000000,-0.1155220598,-0.1293242652,-0.1312929144,-0.1366108723
1528.2250000000,-0.1136481724,-0.1274380065,-0.1361888753,-0.1341980360
1528.2300000000,-0.1155220598,-0.1255521037,-0.1337405953,-0.1317857817
1528.2350000000,-0.1080286162,-0.1274380065,-0.1263993494,-0.1366108723
1528.2400000000,-0.1024122162,-0.1161279205,-0.1190634889,-0.1245525084
1528.2450000000,-0.1042839991,-0.1085949635,-0.1215081778,-0.1269630182
1528.2500000000,-0.1024122162,-0.1161279205,-0.1117330060,-0.1221425794
1528.2550000000,-0.0986697012,-0.1048306118,-0.1117330060,-0.1197332312
1528.2600000000,-0.0855819177,-0.0991867400,-0.1092907053,-0.1149162754
1528.2650000000,-0.0874505527,-0.1010676767,-0.0970881413,-0.1101016388
1528.2700000000,-0.0911888705,-0.1029489673,-0.0946494143,-0.1125086673
1528.2750000000,-0.0855819177,-0.0916665291,-0.0849004493,-0.1052893192
1528.2800000000,-0.0762439770,-0.0954259276,-0.0873367997,-0.0932686422
1528.2850000000,-0.0762439770,-0.0860300799,-0.0751609794,-0.0908662397
1528.2900000000,-0.0669147478,-0.0710150620,-0.0557104505,-0.0788628774
1528.2950000000,-0.0687798975,-0.0672648276,-0.0532817923,-0.0788628774
1528.3000000000,-0.0575942140,-0.0691397690,-0.0459993548,-0.0644778353
1528.3050000000,-0.0520060608,-0.0672648276,-0.0338737319,-0.0572930667
1528.3100000000,-0.0557311493,-0.0635159991,-0.0314503707,-0.0501134565
1528.3150000000,-0.0445600440,-0.0560225555,-0.0266054093,-0.0453299118
1528.3200000000,-0.0426994058,-0.0410524928,-0.0217627942,-0.0309929918
1528.3250000000,-0.0389791677,-0.0466636404,-0.0169225231,-0.0262185825
1528.3300000000,-0.0426994058,-0.0391828097,-0.0217627942,-0.0262185825
1528.3350000000,-0.0408391137,-0.0354444919,-0.0241838086,-0.0238322324
1528.3400000000,-0.0315428409,-0.0261048069,-0.0096665063,-0.0142925227
1528.3450000000,-0.0296846229,-0.0279720462,0.0000000000,-0.0166765971
1528.3500000000,-0.0222552021,-0.0298396342,0.0096571712,-0.0166765971
1528.3550000000,-0.0185425605,-0.0354444919,0.0024151673,-0.0166765971
1528.3600000000,-0.0111214099,-0.0167738368,0.0120700075,-0.0095260784
1528.3650000000,-0.0129761813,-0.0149086871,0.0144822618,-0.0095260784
1528.3700000000,-0.0037057625,-0.0186393344,0.0000000000,-0.0095260784
1528.3750000000,-0.0055591589,-0.0130438852,0.0096571712,-0.0166765971
1528.3800000000,0.0000000000,-0.0130438852,0.0024151673,-0.0095260784
1528.3850000000,-0.0111214099,-0.0093153244,-0.0120845936,-0.0214464517
1528.3900000000,-0.0055591589,-0.0074515652,-0.0120845936,-0.0286055022
1528.3950000000,-0.0037057625,-0.0149086871,-0.0217627942,-0.0405486542
1528.4000000000,-0.0037057625,-0.0149086871,-0.0241838086,-0.0429389973
1528.4050000000,-0.0074128988,-0.0186393344,-0.0387222168,-0.0572930667
1528.4100000000,-0.0148312967,-0.0205051801,-0.0459993548,-0.0668739058
1528.4150000000,-0.0203987090,-0.0223713740,-0.0557104505,-0.0836624935
1528.4200000000,-0.0074128988,-0.0205051801,-0.0629999661,-0.0884644143
1528.4250000000,-0.0148312967,-0.0186393344,-0.0849004493,-0.1028840275
1528.4300000000,-0.0111214099,-0.0354444919,-0.0946494143,-0.1197332312
1528.4350000000,-0.0222552021,-0.0410524928,-0.1141759033,-0.1366108723
1528.4400000000,-0.0296846229,-0.0317075711,-0.1166193975,-0.1486837942
1528.4450000000,-0.0278267502,-0.0429225255,-0.1410872345,-0.1583526371
1528.4500000000,-0.0241120399,-0.0466636404,-0.1508911568,-0.1704518521
1528.4550000000,-0.0408391137,-0.0391828097,-0.1680711832,-0.1849902603
1528.4600000000,-0.0296846229,-0.0447929080,-0.1877417083,-0.2092680096
1528.4650000000,-0.0408391137,-0.0560225555,-0.1902032468,-0.2311684928
1528.4700000000,-0.0408391137,-0.0447929080,-0.2074510027,-0.2531170445
1528.4750000000,-0.0408391137,-0.0560225555,-0.2370879718,-0.2677762213
1528.4800000000,-0.0389791677,-0.0504061555,-0.2296704909,-0.2702215080
1528.4850000000,-0.0464210285,-0.0653902377,-0.2420360174,-0.3020647683
1528.4900000000,-0.0520060608,-0.0803968059,-0.2643325707,-0.3192532317
1528.4950000000,-0.0613213851,-0.0803968059,-0.2767410597,-0.3266287698
1528.5000000000,-0.0575942140,-0.0691397690,-0.2841935504,-0.3413961857
1528.5050000000,-0.0538684316,-0.0691397690,-0.2891649649,-0.3512532590
1528.5100000000,-0.0520060608,-0.0841519693,-0.3115669655,-0.3561854416
1528.5150000000,-0.0631854918,-0.0803968059,-0.3065844044,-0.3660571107
1528.5200000000,-0.0613213851,-0.0785197528,-0.3040940545,-0.3759385344
1528.5250000000,-0.0687798975,-0.0822742113,-0.2966267237,-0.3709966020
1528.5300000000,-0.0613213851,-0.0691397690,-0.3115669655,-0.3808829103
1528.5350000000,-0.0706453951,-0.0897873597,-0.3040940545,-0.3709966020
1528.5400000000,-0.0631854918,-0.0691397690,-0.2916515992,-0.3709966020
1528.5450000000,-0.0706453951,-0.0747667034,-0.2668130370,-0.3635882797
1528.5500000000,-0.0575942140,-0.0653902377,-0.2593734831,-0.3438595433
1528.5550000000,-0.0613213851,-0.0691397690,-0.2593734831,-0.3413961857
1528.5600000000,-0.0650499460,-0.0785197528,-0.2544168535,-0.3389334348
1528.5650000000,-0.0482823593,-0.0672648276,-0.2346148668,-0.3118831294
1528.5700000000,-0.0557311493,-0.0504061555,-0.2222585079,-0.2996116835
1528.5750000000,-0.0557311493,-0.0560225555,-0.2049852155,-0.2849057985
1528.5800000000,-0.0426994058,-0.0616421117,-0.1926653913,-0.2580010495
1528.5850000000,-0.0426994058,-0.0466636404,-0.1754430965,-0.2433561848
1528.5900000000,-0.0426994058,-0.0504061555,-0.1533436400,-0.2214290229
1528.5950000000,-0.0501440367,-0.0391828097,-0.1312929144,-0.2019784940
1528.6000000000,-0.0389791677,-0.0391828097,-0.1068490010,-0.1777184142
1528.6050000000,-0.0352603130,-0.0335758569,-0.0897737438,-0.1486837942
1528.6100000000,-0.0334014042,-0.0298396342,-0.0775949577,-0.1317857817
1528.6150000000,-0.0296846229,-0.0242379162,-0.0557104505,-0.1101016388
1528.6200000000,-0.0185425605,-0.0242379162,-0.0459993548,-0.0860631657
1528.6250000000,-0.0111214099,-0.0167738368,-0.0217627942,-0.0620823388
1528.6300000000,-0.0055591589,-0.0074515652,-0.0048320851,-0.0453299118
1528.6350000000,-0.0055591589,-0.0018623708,-0.0048320851,-0.0333810515
1528.6400000000,-0.0055591589,-0.0111794310,0.0096571712,-0.0214464517
1528.6450000000,-0.0018527096,-0.0093153244,0.0168939343,-0.0023806690
1528.6500000000,-0.0055591589,-0.0055881533,0.0144822618,-0.0023806690
1528.6550000000,0.0000000000,0.0000000000,0.0000000000,0.0000000000
1528.6600000000,-0.0129761813,-0.0130438852,-0.0048320851,-0.0047619049
1528.6650000000,0.0055560701,-0.0149086871,-0.0120845936,-0.0071437079
1528.6700000000,-0.0037057625,-0.0093153244,-0.0169225231,-0.0142925227
1528.6750000000,-0.0129761813,-0.0223713740,-0.0290275966,-0.0357696816
1528.6800000000,-0.0148312967,-0.0261048069,-0.0629999661,-0.0596874161
1528.6850000000,-0.0092669824,-0.0317075711,-0.0970881413,-0.0812623975
1528.6900000000,-0.0185425605,-0.0410524928,-0.1288458326,-0.1221425794
1528.6950000000,-0.0203987090,-0.0560225555,-0.1754430965,-0.1631905666
1528.7000000000,-0.0352603130,-0.0578953900,-0.2197890672,-0.2116990294
1528.7050000000,-0.0296846229,-0.0822742113,-0.2866789487,-0.2775609579
1528.7100000000,-0.0520060608,-0.0803968059,-0.3265295618,-0.3241696526
1528.7150000000,-0.0594576259,-0.1104776708,-0.4016802161,-0.4006848970
1528.7200000000,-0.0855819177,-0.1330978501,-0.4723340553,-0.4777901167
1528.7250000000,-0.0911888705,-0.1482064460,-0.5383912061,-0.5580111535
1528.7300000000,-0.1005407836,-0.1576609234,-0.6228663021,-0.6312715545
1528.7350000000,-0.1230211228,-0.1917712464,-0.6976957056,-0.7280875973
1528.7400000000,-0.1380361406,-0.2183821726,-0.7887591682,-0.8310221140
1528.7450000000,-0.1511928007,-0.2298085688,-0.8780220344,-0.9324138574
1528.7500000000,-0.1888789203,-0.2584318113,-0.9867331674,-1.0374844327
1528.7550000000,-0.1907669596,-0.3005613259,-1.0858632491,-1.1436707238
1528.7600000000,-0.2304983523,-0.3236160912,-1.1995931508,-1.2726007934
1528.7650000000,-0.2456757409,-0.3582982069,-1.2788826981,-1.3731314593
1528.7700000000,-0.2475745352,-0.3776181511,-1.3892895607,-1.5023073658
1528.7750000000,-0.2837202989,-0.4299692159,-1.4813019205,-1.6443908258
1528.7800000000,-0.3008876851,-0.4513762494,-1.6195074766,-1.7345830945
1528.7850000000,-0.3257371674,-0.4845502480,-1.7366349405,-1.8456162636
1528.7900000000,-0.3564061583,-0.4982421817,-1.8232155679,-2.0072359432
1528.7950000000,-0.3775457838,-0.5237199025,-1.9427679468,-2.1007765259
1528.8000000000,-0.3948751421,-0.5531981591,-2.0578304347,-2.2338161821
1528.8050000000,-0.4122345832,-0.5926381629,-2.1592330334,-2.3777035566
1528.8100000000,-0.4489815543,-0.6282676543,-2.2556193218,-2.4900472310
1528.8150000000,-0.4547960714,-0.6620346940,-2.3651761084,-2.5974926238
1528.8200000000,-0.4936461591,-0.6819510519,-2.4759464718,-2.7092256298
1528.8250000000,-0.5150782179,-0.7159001609,-2.5692017326,-2.8253782463
1528.8300000000,-0.5267878212,-0.7399338196,-2.6727970713,-2.9205566298
1528.8350000000,-0.5561219578,-0.7620155308,-2.7265861584,-3.0392048070
1528.8400000000,-0.5718020864,-0.7982547491,-2.8190170954,-3.1462270706
1528.8450000000,-0.6012687613,-0.8204657628,-2.9220112469,-3.2149333771
1528.8500000000,-0.6130797863,-0.8346257732,-2.9771614272,-3.2940372834
1528.8550000000,-0.6426685247,-0.8447523564,-3.0424358104,-3.3771080385
1528.8600000000,-0.6446442236,-0.8914671768,-3.1147332006,-3.4642399571
1528.8650000000,-0.6466203130,-0.8772265071,-3.1842353834,-3.5216240808
1528.8700000000,-0.6901933667,-0.8955396671,-3.2408550184,-3.5963780816
1528.8750000000,-0.6961498843,-0.9220513580,-3.2642624860,-3.6888920188
1528.8800000000,-0.6961498843,-0.9445393569,-3.3280746253,-3.6888920188
1528.8850000000,-0.7279780392,-0.9445393569,-3.3348154412,-3.7406609006
1528.8900000000,-0.7001228680,-0.9322669070,-3.3719713698,-3.8066219105
1528.8950000000,-0.7100622387,-0.9302229621,-3.3956881351,-3.7996581219
1528.9000000000,-0.7140407547,-0.9506812344,-3.4024746980,-3.8450096736
1528.9050000000,-0.7180208543,-0.9486335227,-3.4194612827,-3.8660107313
1528.9100000000,-0.6901933667,-0.9465862303,-3.4092658697,-3.8695151996
1528.9150000000,-0.7080735741,-0.9445393569,-3.4092658697,-3.8660107313
1528.9200000000,-0.7220025386,-0.9240936331,-3.3821288110,-3.8520051268
1528.9250000000,-0.7001228680,-0.9424929023,-3.4262640040,-3.8590054771
1528.9300000000,-0.6862243251,-0.8873963442,-3.3449351925,-3.8031394100
1528.9350000000,-0.6941639841,-0.8792596473,-3.3112424382,-3.8031394100
1528.9400000000,-0.6822568583,-0.8731614664,-3.2776628230,-3.7649117353
1528.9450000000,-0.6723450724,-0.8751937802,-3.2275038816,-3.6957790714
1528.9500000000,-0.6466203130,-0.8366502696,-3.2075105394,-3.6545277238
1528.9550000000,-0.6308225214,-0.8305780095,-3.1048436333,-3.6100299609
1528.9600000000,-0.6130797863,-0.7881751192,-3.0621015001,-3.5861513891
1528.9650000000,-0.5776884792,-0.7620155308,-2.9999590271,-3.5216240808
1528.9700000000,-0.5835783390,-0.7439450511,-2.9155429413,-3.4038370889
1528.9750000000,-0.5659191566,-0.7138999609,-2.8510889638,-3.3371479454
1528.9800000000,-0.5267878212,-0.6919241254,-2.7679150998,-3.2313618349
1528.9850000000,-0.5014343215,-0.6620346940,-2.6854273224,-3.1397081655
1528.9900000000,-0.4664352579,-0.5946142522,-2.6004810825,-3.0779896002
1528.9950000000,-0.4567349953,-0.5926381629,-2.4728528909,-2.9620836021
1529.0000000000,-0.4045155555,-0.5788164606,-2.3835528364,-2.8411785340
1529.0050000000,-0.3987301923,-0.5433624152,-2.3011222063,-2.7530167539
1529.0100000000,-0.3640881253,-0.4767346947,-2.1892540707,-2.6407961248
1529.0150000000,-0.3372270193,-0.4533246177,-2.0637669146,-2.5236915509
1529.0200000000,-0.3257371674,-0.4299692159,-1.9986586644,-2.4079424669
1529.0250000000,-0.2951619478,-0.3795522000,-1.8871878710,-2.2965123123
1529.0300000000,-0.2703882333,-0.3525094947,-1.7366349405,-2.1685534171
1529.0350000000,-0.2418792337,-0.3216928293,-1.6479489065,-2.0451313391
1529.0400000000,-0.2210241688,-0.2852209586,-1.5628661471,-1.9203292548
1529.0450000000,-0.1851039109,-0.2527006047,-1.4533298742,-1.8113207170
1529.0500000000,-0.1624837316,-0.2259983192,-1.3284149953,-1.6865671852
1529.0550000000,-0.1324028666,-0.1898731729,-1.2132189875,-1.5577860101
1529.0600000000,-0.1099014508,-0.1576609234,-1.1290365487,-1.4471348120
1529.0650000000,-0.0986697012,-0.1312108796,-1.0268026747,-1.3268161606
1529.0700000000,-0.0557311493,-0.0935460517,-0.9335556956,-1.2294391402
1529.0750000000,-0.0482823593,-0.0766430521,-0.8595791363,-1.1223430697
1529.0800000000,-0.0222552021,-0.0410524928,-0.7548387182,-1.0216532948
1529.0850000000,-0.0037057625,-0.0298396342,-0.6718291624,-0.9011067617
1529.0900000000,0.0295967660,0.0111669470,-0.5895029964,-0.8155142277
1529.0950000000,0.0388278199,0.0167457477,-0.4900757911,-0.7152949641
1529.1000000000,0.0517369964,0.0445931620,-0.4344217137,-0.6211347062
1529.1050000000,0.0683100598,0.0501533512,-0.3615295976,-0.5504630339
1529.1100000000,0.0830186486,0.0834497193,-0.2966267237,-0.4553434181
1529.1150000000,0.0958709408,0.1000564212,-0.2346148668,-0.3858297321
1529.1200000000,0.1087067361,0.1129537053,-0.1754430965,-0.3192532317
1529.1250000000,0.1178650846,0.1147948174,-0.1166193975,-0.2555587488
1529.1300000000,0.1270150532,0.1295115235,-0.0800295286,-0.2019784940
1529.1350000000,0.1343290049,0.1478770015,-0.0290275966,-0.1366108723
1529.1400000000,0.1452899121,0.1533800742,0.0096571712,-0.0932686422
1529.1450000000,0.1525905147,0.1533800742,0.0457887292,-0.0548992905
1529.1500000000,0.1580624710,0.1662088124,0.0722024797,-0.0142925227
1529.1550000000,0.1708187370,0.1790211139,0.1009381317,0.0214005551
1529.1600000000,0.1726397331,0.1717018089,0.1224358111,0.0427554095
1529.1650000000,0.1799204032,0.1863350656,0.1248215918,0.0616992940
1529.1700000000,0.1708187370,0.1845070791,0.1462680435,0.0829683555
1529.1750000000,0.1708187370,0.1771917899,0.1510276819,0.0971226396
1529.1800000000,0.1762807308,0.1899900364,0.1652930195,0.1089025914
1529.1850000000,0.1799204032,0.1753621311,0.1605401677,0.1136106895
1529.1900000000,0.1799204032,0.1863350656,0.1629168760,0.1159639075
1529.1950000000,0.1799204032,0.1771917899,0.1629168760,0.1206686829
1529.2000000000,0.1762807308,0.1845070791,0.1700436134,0.1206686829
1529.2050000000,0.1781007326,0.1735321375,0.1534066518,0.1159639075
1529.2100000000,0.1817397428,0.1771917899,0.1557850559,0.1112569175
1529.2150000000,0.1835587515,0.1826787584,0.1605401677,0.1136106895
1529.2200000000,0.1817397428,0.1717018089,0.1415061386,0.1065477109
1529.2250000000,0.1708187370,0.1680401465,0.1295914464,0.1018362856
1529.2300000000,0.1617087792,0.1607127968,0.1272068035,0.0924067706
1529.2350000000,0.1653537583,0.1680401465,0.1248215918,0.0829683555
1529.2400000000,0.1580624710,0.1552137590,0.1033290462,0.0758836935
1529.2450000000,0.1635314348,0.1533800742,0.0961545870,0.0687940087
1529.2500000000,0.1562388183,0.1497116956,0.0913687530,0.0545995422
1529.2550000000,0.1598857913,0.1478770015,0.0961545870,0.0545995422
1529.2600000000,0.1398109602,0.1570471076,0.0865806274,0.0451253586
1529.2650000000,0.1507658636,0.1460419708,0.0746002738,0.0356421905
1529.2700000000,0.1452899121,0.1313495898,0.0650056460,0.0285239081
1529.2750000000,0.1471155625,0.1478770015,0.0746002738,0.0261500208
1529.2800000000,0.1398109602,0.1368617627,0.0602048778,0.0214005551
1529.2850000000,0.1361566572,0.1368617627,0.0722024797,0.0190249760
1529.2900000000,0.1379839757,0.1405348573,0.0529994013,0.0142721242
1529.2950000000,0.1434639283,0.1423708988,0.0626055500,0.0142721242
1529.3000000000,0.1343290049,0.1386984786,0.0602048778,0.0166488325
1529.3050000000,0.1398109602,0.1295115235,0.0650056460,0.0166488325
1529.3100000000,0.1398109602,0.1386984786,0.0769974930,0.0190249760
1529.3150000000,0.1416376111,0.1331873184,0.0650056460,0.0214005551
1529.3200000000,0.1416376111,0.1386984786,0.0769974930,0.0214005551
1529.3250000000,0.1416376111,0.1442066033,0.0793941377,0.0214005551
1529.3300000000,0.1379839757,0.1331873184,0.0793941377,0.0261500208
1529.3350000000,0.1416376111,0.1460419708,0.0793941377,0.0332699927
1529.3400000000,0.1471155625,0.1386984786,0.0793941377,0.0356421905
1529.3450000000,0.1343290049,0.1497116956,0.0961545870,0.0403848987
1529.3500000000,0.1434639283,0.1497116956,0.0913687530,0.0427554095
1529.3550000000,0.1452899121,0.1497116956,0.1081091610,0.0545995422
1529.3600000000,0.1525905147,0.1570471076,0.1128869920,0.0593332701
1529.3650000000,0.1471155625,0.1625451377,0.1057193893,0.0616992940
1529.3700000000,0.1598857913,0.1497116956,0.1057193893,0.0735210237
1529.3750000000,0.1544148328,0.1735321375,0.1272068035,0.0829683555
1529.3800000000,0.1671757497,0.1607127968,0.1343590270,0.0876886766
1529.3850000000,0.1653537583,0.1680401465,0.1248215918,0.0947649831
1529.3900000000,0.1617087792,0.1662088124,0.1486481459,0.1018362856
1529.3950000000,0.1744603976,0.1790211139,0.1486481459,0.1112569175
1529.4000000000,0.1781007326,0.1826787584,0.1462680435,0.1183165719
1529.4050000000,0.1726397331,0.1899900364,0.1510276819,0.1183165719
1529.4100000000,0.1762807308,0.1881627180,0.1486481459,0.1277216984
1529.4150000000,0.1762807308,0.1790211139,0.1605401677,0.1253712459
1529.4200000000,0.1835587515,0.1918170210,0.1700436134,0.1324209466
1529.4250000000,0.1762807308,0.1954699891,0.1557850559,0.1324209466
1529.4300000000,0.1890137930,0.1991216232,0.1581628944,0.1324209466
1529.4350000000,0.1853774293,0.1899900364,0.1652930195,0.1347697428
1529.4400000000,0.1926488348,0.2100685318,0.1652930195,0.1394656809
1529.4450000000,0.1962825558,0.1991216232,0.1724180643,0.1394656809
1529.4500000000,0.1926488348,0.2082448790,0.1724180643,0.1418128233
1529.4550000000,0.2017306627,0.2064208936,0.1819102340,0.1418128233
1529.4600000000,0.2071758031,0.2210034700,0.1771652754,0.1488509468
1529.4650000000,0.2089901912,0.2137148399,0.1795380362,0.1465054560
1529.4700000000,0.2180571969,0.2137148399,0.1771652754,0.1441594149
1529.4750000000,0.2144313811,0.2246457938,0.1676685986,0.1418128233
1529.4800000000,0.2216816986,0.2228247978,0.1652930195,0.1441594149
1529.4850000000,0.2271159891,0.2264664584,0.1700436134,0.1441594149
1529.4900000000,0.2198696120,0.2373834900,0.1700436134,0.1418128233
1529.4950000000,0.2289267632,0.2373834900,0.1676685986,0.1418128233
1529.5000000000,0.2361665826,0.2464719211,0.1676685986,0.1418128233
1529.5050000000,0.2289267632,0.2392018372,0.1724180643,0.1371179875
1529.5100000000,0.2343571191,0.2319264640,0.1652930195,0.1347697428
1529.5150000000,0.2361665826,0.2301067933,0.1700436134,0.1300715985
1529.5200000000,0.2379757187,0.2482886165,0.1771652754,0.1347697428
1529.5250000000,0.2415930094,0.2410198537,0.1700436134,0.1371179875
1529.5300000000,0.2379757187,0.2501049820,0.1724180643,0.1324209466
1529.5350000000,0.2397845276,0.2537367235,0.1795380362,0.1347697428
1529.5400000000,0.2452089921,0.2573671464,0.1890234530,0.1371179875
1529.5450000000,0.2452089921,0.2555520997,0.1890234530,0.1394656809
1529.5500000000,0.2506305156,0.2537367235,0.1819102340,0.1347697428
1529.5550000000,0.2542432325,0.2555520997,0.1890234530,0.1441594149
1529.5600000000,0.2614647529,0.2555520997,0.1937627896,0.1558841202
1529.5650000000,0.2668774729,0.2700632577,0.1937627896,0.1582274125
1529.5700000000,0.2596598616,0.2609962519,0.1890234530,0.1535402786
1529.5750000000,0.2542432325,0.2646240408,0.2079673375,0.1558841202
1529.5800000000,0.2578546446,0.2773109478,0.2008675857,0.1699356447
1529.5850000000,0.2650735584,0.2773109478,0.2103328017,0.1699356447
1529.5900000000,0.2650735584,0.2682505141,0.1984998811,0.1722756471
1529.5950000000,0.2632693184,0.2609962519,0.2032347297,0.1699356447
1529.6000000000,0.2596598616,0.2773109478,0.2174258390,0.1769540098
1529.6050000000,0.2578546446,0.2754995177,0.2079673375,0.1839674525
1529.6100000000,0.2650735584,0.2773109478,0.2056013136,0.1792923706
1529.6150000000,0.2668774729,0.2773109478,0.2197890672,0.1839674525
1529.6200000000,0.2686810621,0.2646240408,0.2126977065,0.1933110645
1529.6250000000,0.2632693184,0.2664374418,0.2268754027,0.1886403498
1529.6300000000,0.2614647529,0.2682505141,0.2245138488,0.1886403498
1529.6350000000,0.2578546446,0.2791220499,0.2292363990,0.1933110645
1529.6400000000,0.2668774729,0.2754995177,0.2292363990,0.2026459543
1529.6450000000,0.2650735584,0.2791220499,0.2292363990,0.2049783158
1529.6500000000,0.2632693184,0.2791220499,0.2292363990,0.2003130486
1529.6550000000,0.2668774729,0.2628103109,0.2315968381,0.2003130486
1529.6600000000,0.2722872648,0.2773109478,0.2363160453,0.2049783158
1529.6650000000,0.2650735584,0.2809328240,0.2315968381,0.2073101335
1529.6700000000,0.2614647529,0.2718756727,0.2245138488,0.2049783158
1529.6750000000,0.2542432325,0.2700632577,0.2150620522,0.2003130486
1529.6800000000,0.2560491015,0.2646240408,0.2268754027,0.2049783158
1529.6850000000,0.2578546446,0.2646240408,0.2150620522,0.2003130486
1529.6900000000,0.2560491015,0.2682505141,0.2197890672,0.2003130486
1529.6950000000,0.2470164932,0.2609962519,0.2174258390,0.1979795986
1529.7000000000,0.2452089921,0.2519210176,0.2197890672,0.1956456040
1529.7050000000,0.2506305156,0.2646240408,0.2292363990,0.2003130486
1529.7100000000,0.2542432325,0.2609962519,0.2126977065,0.2003130486
1529.7150000000,0.2397845276,0.2573671464,0.2150620522,0.1956456040
1529.7200000000,0.2397845276,0.2501049820,0.2197890672,0.1933110645
1529.7250000000,0.2452089921,0.2519210176,0.2197890672,0.1956456040
1529.7300000000,0.2434011642,0.2609962519,0.2056013136,0.1956456040
1529.7350000000,0.2415930094,0.2555520997,0.2056013136,0.1956456040
1529.7400000000,0.2361665826,0.2591818638,0.2103328017,0.1886403498
1529.7450000000,0.2542432325,0.2519210176,0.2103328017,0.1909759798
1529.7500000000,0.2488236677,0.2519210176,0.2032347297,0.1839674525
1529.7550000000,0.2488236677,0.2428375398,0.1890234530,0.1816301847
1529.7600000000,0.2379757187,0.2446548956,0.1890234530,0.1769540098
1529.7650000000,0.2506305156,0.2591818638,0.1937627896,0.1746151020
1529.7700000000,0.2452089921,0.2591818638,0.2008675857,0.1699356447
1529.7750000000,0.2470164932,0.2519210176,0.1937627896,0.1675950947
1529.7800000000,0.2452089921,0.2464719211,0.1842818693,0.1629123505
1529.7850000000,0.2488236677,0.2573671464,0.2032347297,0.1629123505
1529.7900000000,0.2488236677,0.2555520997,0.1984998811,0.1652539967
1529.7950000000,0.2506305156,0.2573671464,0.2008675857,0.1675950947
1529.8000000000,0.2524370372,0.2591818638,0.1890234530,0.1582274125
1529.8050000000,0.2650735584,0.2773109478,0.2056013136,0.1746151020
1529.8100000000,0.2650735584,0.2718756727,0.2126977065,0.1746151020
1529.8150000000,0.2758921675,0.2809328240,0.2103328017,0.1769540098
1529.8200000000,0.2668774729,0.2736877594,0.2079673375,0.1792923706
1529.8250000000,0.2812970861,0.2954072249,0.2174258390,0.1886403498
1529.8300000000,0.2812970861,0.2954072249,0.2292363990,0.1933110645
1529.8350000000,0.2920981672,0.2935990701,0.2174258390,0.1956456040
1529.8400000000,0.2974943361,0.2954072249,0.2292363990,0.2003130486
1529.8450000000,0.2956959367,0.3116659224,0.2363160453,0.2049783158
1529.8500000000,0.2956959367,0.3098607053,0.2410330266,0.2073101335
1529.8550000000,0.3028875947,0.3044430979,0.2433906831,0.2119721382
1529.8600000000,0.3010901650,0.3134708136,0.2363160453,0.2119721382
1529.8650000000,0.3118699001,0.3062492932,0.2551706349,0.2236176502
1529.8700000000,0.3118699001,0.3170796192,0.2504603193,0.2259451261
1529.8750000000,0.3190499399,0.3206871228,0.2622319510,0.2282720603
1529.8800000000,0.3190499399,0.3206871228,0.2575249610,0.2329243051
1529.8850000000,0.3208441446,0.3369048036,0.2692882843,0.2398986167
1529.8900000000,0.3244315886,0.3387051457,0.2692882843,0.2491901388
1529.8950000000,0.3333945721,0.3369048036,0.2692882843,0.2491901388
1529.9000000000,0.3351862052,0.3405051637,0.2833860310,0.2538326645
1529.9050000000,0.3423495293,0.3441042280,0.2810377863,0.2584730358
1529.9100000000,0.3459292680,0.3459032745,0.2833860310,0.2677473235
1529.9150000000,0.3495077257,0.3566907621,0.2927734995,0.2723812439
1529.9200000000,0.3530849034,0.3530962257,0.2927734995,0.2746973991
1529.9250000000,0.3602354221,0.3656714542,0.3091803940,0.2862701350
1529.9300000000,0.3566608018,0.3566907621,0.3044954560,0.2885830759
1529.9350000000,0.3602354221,0.3584875458,0.3044954560,0.2885830759
1529.9400000000,0.3548730124,0.3638759609,0.3091803940,0.2885830759
1529.9450000000,0.3584482717,0.3692614740,0.3068381994,0.3001397627
1529.9500000000,0.3655949577,0.3746440883,0.3162036882,0.2978294936
1529.9550000000,0.3584482717,0.3746440883,0.3185436906,0.2955186906
1529.9600000000,0.3584482717,0.3800238068,0.3138631382,0.2955186906
1529.9650000000,0.3727365399,0.3746440883,0.3115220402,0.3001397627
1529.9700000000,0.3673808315,0.3836086787,0.3255604141,0.3001397627
1529.9750000000,0.3727365399,0.3800238068,0.3208831455,0.3001397627
1529.9800000000,0.3673808315,0.3818164034,0.3278982282,0.2932073534
1529.9850000000,0.3727365399,0.3782308889,0.3302354960,0.3001397627
1529.9900000000,0.3780893815,0.3800238068,0.3232220533,0.2955186906
1529.9950000000,0.3745211388,0.3854006329,0.3115220402,0.2955186906
1530.0000000000,0.3727365399,0.3818164034,0.3068381994,0.2932073534
1530.0050000000,0.3638087650,0.3674666252,0.3115220402,0.2908954820
1530.0100000000,0.3763054193,0.3818164034,0.3115220402,0.2885830759
1530.0150000000,0.3638087650,0.3728502054,0.3091803940,0.2885830759
1530.0200000000,0.3620222531,0.3764376494,0.3091803940,0.2793281007
1530.0250000000,0.3548730124,0.3782308889,0.2904274584,0.2770130179
1530.0300000000,0.3655949577,0.3782308889,0.2974639311,0.2746973991
1530.0350000000,0.3602354221,0.3692614740,0.2904274584,0.2700645521
1530.0400000000,0.3655949577,0.3728502054,0.2810377863,0.2654295578
1530.0450000000,0.3655949577,0.3728502054,0.2833860310,0.2631112548
1530.0500000000,0.3548730124,0.3674666252,0.2786889901,0.2561531193
1530.0550000000,0.3638087650,0.3800238068,0.2857337244,0.2584730358
1530.0600000000,0.3566608018,0.3764376494,0.2763396420,0.2538326645
1530.0650000000,0.3548730124,0.3710560007,0.2786889901,0.2515116711
1530.0700000000,0.3512964745,0.3692614740,0.2716392894,0.2515116711
1530.0750000000,0.3566608018,0.3656714542,0.2716392894,0.2515116711
1530.0800000000,0.3584482717,0.3584875458,0.2645846154,0.2468680675
1530.0850000000,0.3566608018,0.3692614740,0.2669367264,0.2422223067
1530.0900000000,0.3530849034,0.3530962257,0.2669367264,0.2422223067
1530.0950000000,0.3566608018,0.3566907621,0.2551706349,0.2398986167
1530.1000000000,0.3548730124,0.3566907621,0.2669367264,0.2422223067
1530.1050000000,0.3512964745,0.3620801451,0.2598787330,0.2398986167
1530.1100000000,0.3530849034,0.3530962257,0.2622319510,0.2375743866
1530.1150000000,0.3459292680,0.3656714542,0.2575249610,0.2375743866
1530.1200000000,0.3441395588,0.3620801451,0.2692882843,0.2398986167
1530.1250000000,0.3530849034,0.3620801451,0.2598787330,0.2445454569
1530.1300000000,0.3548730124,0.3566907621,0.2575249610,0.2422223067
1530.1350000000,0.3459292680,0.3512984729,0.2622319510,0.2468680675
1530.1400000000,0.3441395588,0.3638759609,0.2716392894,0.2491901388
1530.1450000000,0.3548730124,0.3656714542,0.2645846154,0.2584730358
1530.1500000000,0.3548730124,0.3602840068,0.2716392894,0.2561531193
1530.1550000000,0.3566608018,0.3584875458,0.2669367264,0.2561531193
1530.1600000000,0.3638087650,0.3638759609,0.2692882843,0.2607924142
1530.1650000000,0.3673808315,0.3800238068,0.2786889901,0.2654295578
1530.1700000000,0.3638087650,0.3836086787,0.2763396420,0.2700645521
1530.1750000000,0.3727365399,0.3871922659,0.2833860310,0.2700645521
1530.1800000000,0.3673808315,0.3782308889,0.2810377863,0.2700645521
1530.1850000000,0.3727365399,0.3889835781,0.2904274584,0.2700645521
1530.1900000000,0.3780893815,0.3889835781,0.2904274584,0.2746973991
1530.1950000000,0.3798730255,0.3925652400,0.2951189903,0.2746973991
1530.2000000000,0.3870044217,0.3907745694,0.2951189903,0.2746973991
1530.2050000000,0.3905682136,0.3997247177,0.3068381994,0.2793281007
1530.2100000000,0.3923496334,0.3997247177,0.3091803940,0.2862701350
1530.2150000000,0.3870044217,0.4086668626,0.3185436906,0.2885830759
1530.2200000000,0.3905682136,0.4122414828,0.3185436906,0.2932073534
1530.2250000000,0.3994721409,0.4140283139,0.3185436906,0.2955186906
1530.2300000000,0.4048106942,0.4086668626,0.3255604141,0.3001397627
1530.2350000000,0.4119243349,0.4158148257,0.3372440233,0.3093755057
1530.2400000000,0.4154792586,0.4158148257,0.3302354960,0.3139901805
1530.2450000000,0.4119243349,0.4318790862,0.3372440233,0.3162967195
1530.2500000000,0.4190329189,0.4283114800,0.3512463593,0.3209082022
1530.2550000000,0.4243610426,0.4354454201,0.3489139978,0.3278214413
1530.2600000000,0.4261364532,0.4318790862,0.3605703693,0.3278214413
1530.2650000000,0.4225853168,0.4372281101,0.3582401817,0.3301247927
1530.2700000000,0.4314607944,0.4443556942,0.3582401817,0.3347299044
1530.2750000000,0.4261364532,0.4407925372,0.3582401817,0.3301247927
1530.2800000000,0.4385555091,0.4479175820,0.3698856937,0.3370316653
1530.2850000000,0.4474168301,0.4461367967,0.3675576760,0.3370316653
1530.2900000000,0.4474168301,0.4461367967,0.3745401038,0.3393328965
1530.2950000000,0.4403284016,0.4496980503,0.3675576760,0.3416335982
1530.3000000000,0.4562703056,0.4674853193,0.3652291162,0.3462334143
1530.3050000000,0.4545002375,0.4621524599,0.3745401038,0.3485325291
1530.3100000000,0.4527298560,0.4639303957,0.3652291162,0.3485325291
1530.3150000000,0.4615786310,0.4728153363,0.3698856937,0.3485325291
1530.3200000000,0.4598095023,0.4621524599,0.3722131696,0.3485325291
1530.3250000000,0.4668841400,0.4728153363,0.3745401038,0.3554267038
1530.3300000000,0.4704195828,0.4674853193,0.3838424301,0.3554267038
1530.3350000000,0.4721868356,0.4799176093,0.3745401038,0.3508311155
1530.3400000000,0.4721868356,0.4816923897,0.3745401038,0.3485325291
1530.3450000000,0.4792527254,0.4834668552,0.3884903502,0.3577237063
1530.3500000000,0.4792527254,0.4745913775,0.3861666602,0.3554267038
1530.3550000000,0.4792527254,0.4852410058,0.3931361110,0.3508311155
1530.3600000000,0.4774867209,0.4816923897,0.3931361110,0.3485325291
1530.3650000000,0.4774867209,0.4781425139,0.3838424301,0.3462334143
1530.3700000000,0.4721868356,0.4870148417,0.3861666602,0.3508311155
1530.3750000000,0.4721868356,0.4799176093,0.3954581823,0.3485325291
1530.3800000000,0.4792527254,0.4852410058,0.3815176596,0.3462334143
1530.3850000000,0.4774867209,0.4799176093,0.3884903502,0.3439337707
1530.3900000000,0.4774867209,0.4745913775,0.3884903502,0.3485325291
1530.3950000000,0.4827837988,0.4870148417,0.3908135004,0.3485325291
1530.4000000000,0.4774867209,0.4852410058,0.3791923486,0.3462334143
1530.4050000000,0.4721868356,0.4834668552,0.3838424301,0.3485325291
1530.4100000000,0.4810184180,0.4728153363,0.3768664968,0.3485325291
1530.4150000000,0.4810184180,0.4799176093,0.3884903502,0.3531291737
1530.4200000000,0.4721868356,0.4852410058,0.3838424301,0.3531291737
1530.4250000000,0.4757204046,0.4745913775,0.3815176596,0.3508311155
1530.4300000000,0.4721868356,0.4710389796,0.3745401038,0.3508311155
1530.4350000000,0.4668841400,0.4887883630,0.3791923486,0.3531291737
1530.4400000000,0.4739537762,0.4816923897,0.3791923486,0.3508311155
1530.4450000000,0.4651159497,0.4710389796,0.3815176596,0.3462334143
1530.4500000000,0.4545002375,0.4781425139,0.3838424301,0.3439337707
1530.4550000000,0.4598095023,0.4728153363,0.3722131696,0.3416335982
1530.4600000000,0.4615786310,0.4710389796,0.3745401038,0.3462334143
1530.4650000000,0.4686520177,0.4674853193,0.3815176596,0.3439337707
1530.4700000000,0.4598095023,0.4674853193,0.3768664968,0.3439337707
1530.4750000000,0.4633474468,0.4674853193,0.3768664968,0.3393328965
1530.4800000000,0.4598095023,0.4674853193,0.3791923486,0.3439337707
1530.4850000000,0.4633474468,0.4745913775,0.3791923486,0.3416335982
1530.4900000000,0.4633474468,0.4710389796,0.3698856937,0.3416335982
1530.4950000000,0.4686520177,0.4745913775,0.3722131696,0.3393328965
1530.5000000000,0.4562703056,0.4603742079,0.3722131696,0.3370316653
1530.5050000000,0.4598095023,0.4728153363,0.3675576760,0.3416335982
1530.5100000000,0.4651159497,0.4710389796,0.3722131696,0.3370316653
1530.5150000000,0.4615786310,0.4728153363,0.3745401038,0.3324276137
1530.5200000000,0.4598095023,0.4639303957,0.3745401038,0.3324276137
1530.5250000000,0.4491881524,0.4728153363,0.3815176596,0.3324276137
1530.5300000000,0.4633474468,0.4692623073,0.3745401038,0.3347299044
1530.5350000000,0.4615786310,0.4710389796,0.3791923486,0.3324276137
1530.5400000000,0.4562703056,0.4674853193,0.3838424301,0.3347299044
1530.5450000000,0.4598095023,0.4639303957,0.3722131696,0.3324276137
1530.5500000000,0.4598095023,0.4781425139,0.3745401038,0.3393328965
1530.5550000000,0.4633474468,0.4728153363,0.3815176596,0.3370316653
1530.5600000000,0.4580400605,0.4728153363,0.3884903502,0.3370316653
1530.5650000000,0.4704195828,0.4692623073,0.3931361110,0.3416335982
1530.5700000000,0.4686520177,0.4799176093,0.3884903502,0.3439337707
1530.5750000000,0.4774867209,0.4799176093,0.3931361110,0.3439337707
1530.5800000000,0.4739537762,0.4905615699,0.4001007080,0.3416335982
1530.5850000000,0.4845488681,0.4870148417,0.3931361110,0.3416335982
1530.5900000000,0.4810184180,0.4958793047,0.3838424301,0.3416335982
1530.5950000000,0.4880780723,0.5029652217,0.3931361110,0.3485325291
1530.6000000000,0.4968956375,0.4958793047,0.3954581823,0.3485325291
1530.6050000000,0.4986582179,0.5047359167,0.4024211628,0.3462334143
1530.6100000000,0.4951327463,0.4994228908,0.4024211628,0.3485325291
1530.6150000000,0.4951327463,0.5118155630,0.3977797146,0.3508311155
1530.6200000000,0.4986582179,0.5029652217,0.4001007080,0.3577237063
1530.6250000000,0.5021824470,0.5188902007,0.4047410793,0.3577237063
1530.6300000000,0.5074664630,0.5224256436,0.4024211628,0.3577237063
1530.6350000000,0.5109875898,0.5224256436,0.4163325956,0.3600201812
1530.6400000000,0.5145074772,0.5277264653,0.4093792983,0.3669064434
1530.6450000000,0.5197849863,0.5224256436,0.4302247025,0.3714946517
1530.6500000000,0.5145074772,0.5312587861,0.4348511194,0.3714946517
1530.6550000000,0.5180261261,0.5436120922,0.4325381785,0.3783730195
1530.6600000000,0.5338447426,0.5312587861,0.4255961442,0.3852466594
1530.6650000000,0.5356008230,0.5418482682,0.4464078062,0.3898264626
1530.6700000000,0.5303316563,0.5418482682,0.4371635255,0.3944041692
1530.6750000000,0.5408672148,0.5506642787,0.4440975371,0.3944041692
1530.6800000000,0.5461308345,0.5594725237,0.4394753969,0.3989797813
1530.6850000000,0.5461308345,0.5506642787,0.4556435492,0.4035533007
1530.6900000000,0.5478847589,0.5612332421,0.4510267440,0.4035533007
1530.6950000000,0.5461308345,0.5559501567,0.4579511528,0.4081247293
1530.7000000000,0.5461308345,0.5682730171,0.4510267440,0.4081247293
1530.7050000000,0.5548973820,0.5559501567,0.4510267440,0.4081247293
1530.7100000000,0.5654071044,0.5717910471,0.4579511528,0.4149779563
1530.7150000000,0.5548973820,0.5665135379,0.4625647630,0.4149779563
1530.7200000000,0.5566497696,0.5682730171,0.4602582240,0.4172613220
1530.7250000000,0.5619050907,0.5753078398,0.4602582240,0.4195441664
1530.7300000000,0.5689078921,0.5876068838,0.4717856028,0.4241082925
1530.7350000000,0.5776545034,0.5876068838,0.4648707702,0.4263895746
1530.7400000000,0.5759057930,0.5858508034,0.4717856028,0.4286703364
1530.7450000000,0.5689078921,0.5823377171,0.4740894848,0.4309505781
1530.7500000000,0.5741567769,0.5911181198,0.4694811898,0.4309505781
1530.7550000000,0.5863934710,0.5858508034,0.4740894848,0.4355095023
1530.7600000000,0.5776545034,0.5823377171,0.4648707702,0.4377881852
1530.7650000000,0.5794029080,0.5893626559,0.4694811898,0.4355095023
1530.7700000000,0.5706578265,0.5805807110,0.4671762457,0.4309505781
1530.7750000000,0.5794029080,0.5840944145,0.4694811898,0.4332303000
1530.7800000000,0.5846462883,0.5946281233,0.4556435492,0.4309505781
1530.7850000000,0.5759057930,0.5840944145,0.4602582240,0.4241082925
1530.7900000000,0.5776545034,0.5911181198,0.4579511528,0.4241082925
1530.7950000000,0.5794029080,0.5788233962,0.4533354130,0.4286703364
1530.8000000000,0.5776545034,0.5876068838,0.4671762457,0.4286703364
1530.8050000000,0.5759057930,0.5840944145,0.4579511528,0.4263895746
1530.8100000000,0.5741567769,0.5911181198,0.4602582240,0.4241082925
1530.8150000000,0.5776545034,0.5840944145,0.4648707702,0.4218264899
1530.8200000000,0.5741567769,0.5823377171,0.4533354130,0.4286703364
1530.8250000000,0.5636562509,0.5823377171,0.4556435492,0.4241082925
1530.8300000000,0.5706578265,0.5805807110,0.4625647630,0.4241082925
1530.8350000000,0.5619050907,0.5788233962,0.4487175418,0.4195441664
1530.8400000000,0.5706578265,0.5823377171,0.4440975371,0.4172613220
1530.8450000000,0.5671576515,0.5876068838,0.4510267440,0.4172613220
1530.8500000000,0.5636562509,0.5735495980,0.4464078062,0.4172613220
1530.8550000000,0.5706578265,0.5805807110,0.4510267440,0.4126940691
1530.8600000000,0.5619050907,0.5700321868,0.4464078062,0.4081247293
1530.8650000000,0.5601536239,0.5823377171,0.4510267440,0.4126940691
1530.8700000000,0.5531446872,0.5735495980,0.4394753969,0.4149779563
1530.8750000000,0.5636562509,0.5770657725,0.4348511194,0.4104096602
1530.8800000000,0.5584018502,0.5665135379,0.4371635255,0.4081247293
1530.8850000000,0.5478847589,0.5629936505,0.4417867341,0.4058392762
1530.8900000000,0.5654071044,0.5700321868,0.4348511194,0.4058392762
1530.8950000000,0.5654071044,0.5717910471,0.4348511194,0.4035533007
1530.9000000000,0.5513916852,0.5647537491,0.4325381785,0.4035533007
1530.9050000000,0.5619050907,0.5682730171,0.4371635255,0.4035533007
1530.9100000000,0.5706578265,0.5788233962,0.4417867341,0.4058392762
1530.9150000000,0.5584018502,0.5717910471,0.4348511194,0.4058392762
1530.9200000000,0.5584018502,0.5788233962,0.4302247025,0.4035533007
1530.9250000000,0.5689078921,0.5805807110,0.4371635255,0.4081247293
1530.9300000000,0.5654071044,0.5753078398,0.4394753969,0.4081247293
1530.9350000000,0.5706578265,0.5858508034,0.4464078062,0.4149779563
1530.9400000000,0.5671576515,0.5788233962,0.4394753969,0.4126940691
1530.9450000000,0.5671576515,0.5858508034,0.4487175418,0.4149779563
1530.9500000000,0.5671576515,0.5823377171,0.4510267440,0.4149779563
1530.9550000000,0.5706578265,0.5823377171,0.4579511528,0.4218264899
1530.9600000000,0.5741567769,0.5823377171,0.4625647630,0.4241082925
1530.9650000000,0.5794029080,0.5858508034,0.4671762457,0.4241082925
1530.9700000000,0.5828988003,0.5963826632,0.4602582240,0.4263895746
1530.9750000000,0.5776545034,0.5893626559,0.4556435492,0.4309505781
1530.9800000000,0.5863934710,0.5981368953,0.4740894848,0.4377881852
1530.9850000000,0.5863934710,0.5981368953,0.4740894848,0.4400663490
1530.9900000000,0.5898869208,0.5928732755,0.4786956572,0.4446211202
1530.9950000000,0.5986152097,0.6104079109,0.4809979479,0.4468977281
1531.0000000000,0.6038485287,0.6226638873,0.4879016417,0.4559989801
